# Supplementary material for: Preparation of MIL-53(Al) with different ligands for application in the glucose transformation to 5-hydroxymethylfurfural
Source: Royal Society of Chemistry journal article supplement (doi:10.1039/d4nj03028a), 2024-01-01
Supplement: d4nj03028a1.pdf [file d4nj03028a1.pdf]

## Supporting information

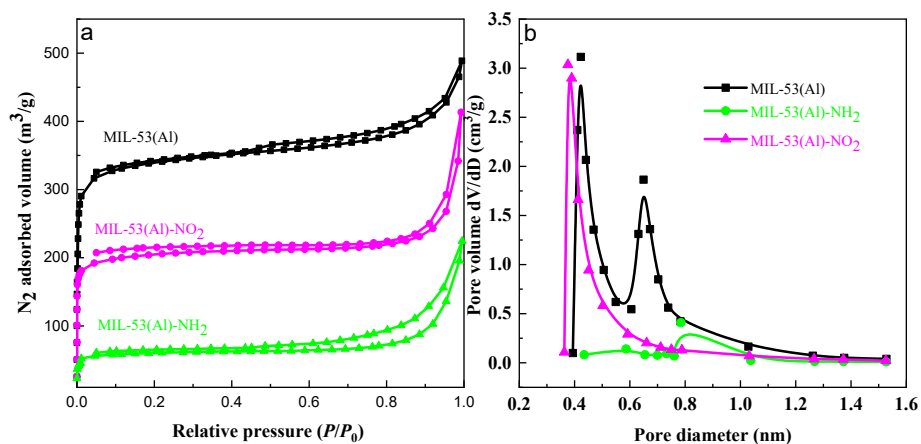

Figure S1 Nitrogen adsorption-desorption isotherms and corresponding pore size distributions of MIL-53(Al), MIL-53(Al)-NO<sub>2</sub> and MIL-53(Al)-NH<sub>2</sub>

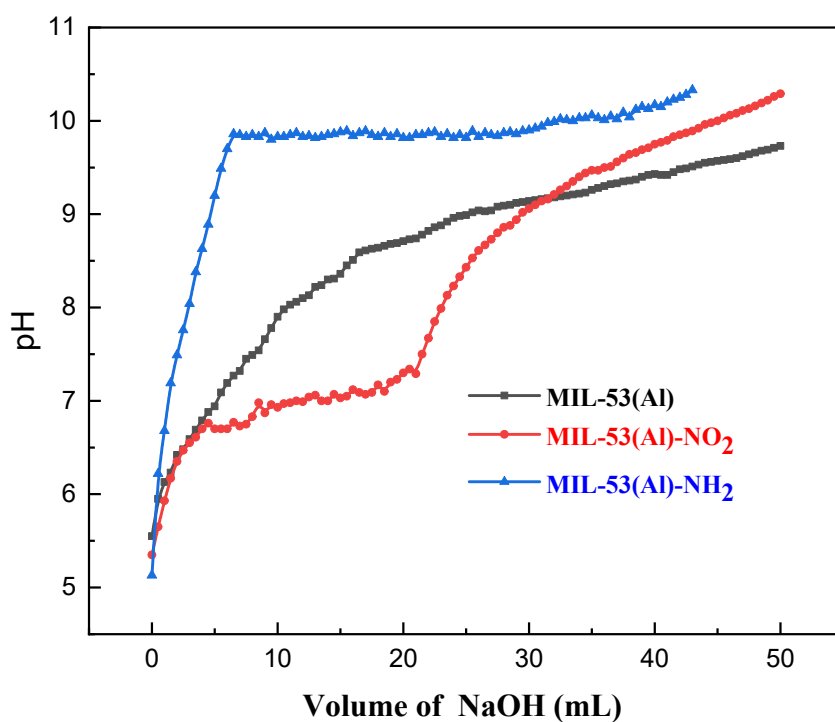

Figure S2 Titration and derivative curve of MIL-53(Al), MIL-53(Al)-NO<sub>2</sub> and MIL-53(Al)-NH<sub>2</sub> with NaOH (0.005M)

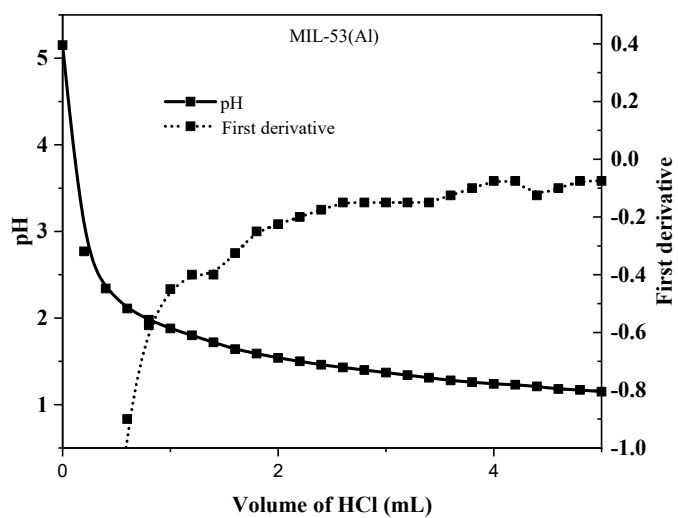

Figure S3 Titration and derivative curve of MIL-53(Al) with HCl (0.1M)

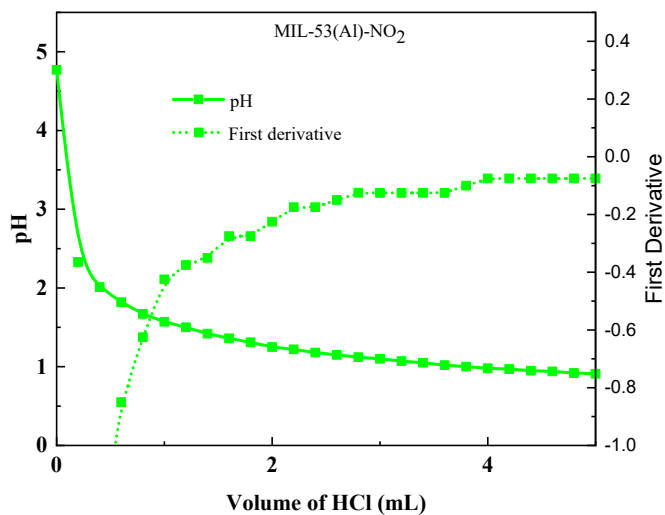

Figure S4 Titration and derivative curve of MIL-53(Al)-NO<sub>2</sub> with HCl (0.1M)

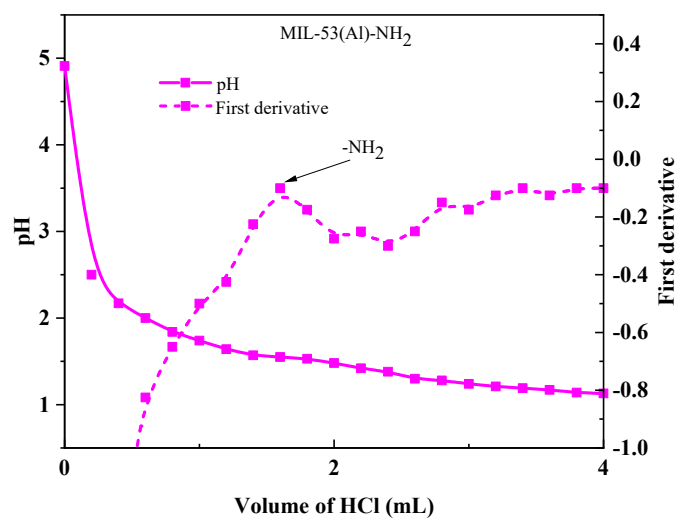

Figure S5 Titration and derivative curve of MIL-53(Al)-NH<sub>2</sub> with HCl (0.1M)
